# Supplementary material
Source: publisher figshare collection journal article supplement (https://sage.figshare.com/ndownloader/files/20066249)
Supplement: Supplementary file 1 [file 20066249]

Y-translation (subsidence), individual migrator curves

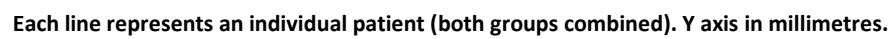

Each line represents an individual patient (both groups combined). Y axis in millimetres.

## Y-rotation (retroversion); individual migrator curves

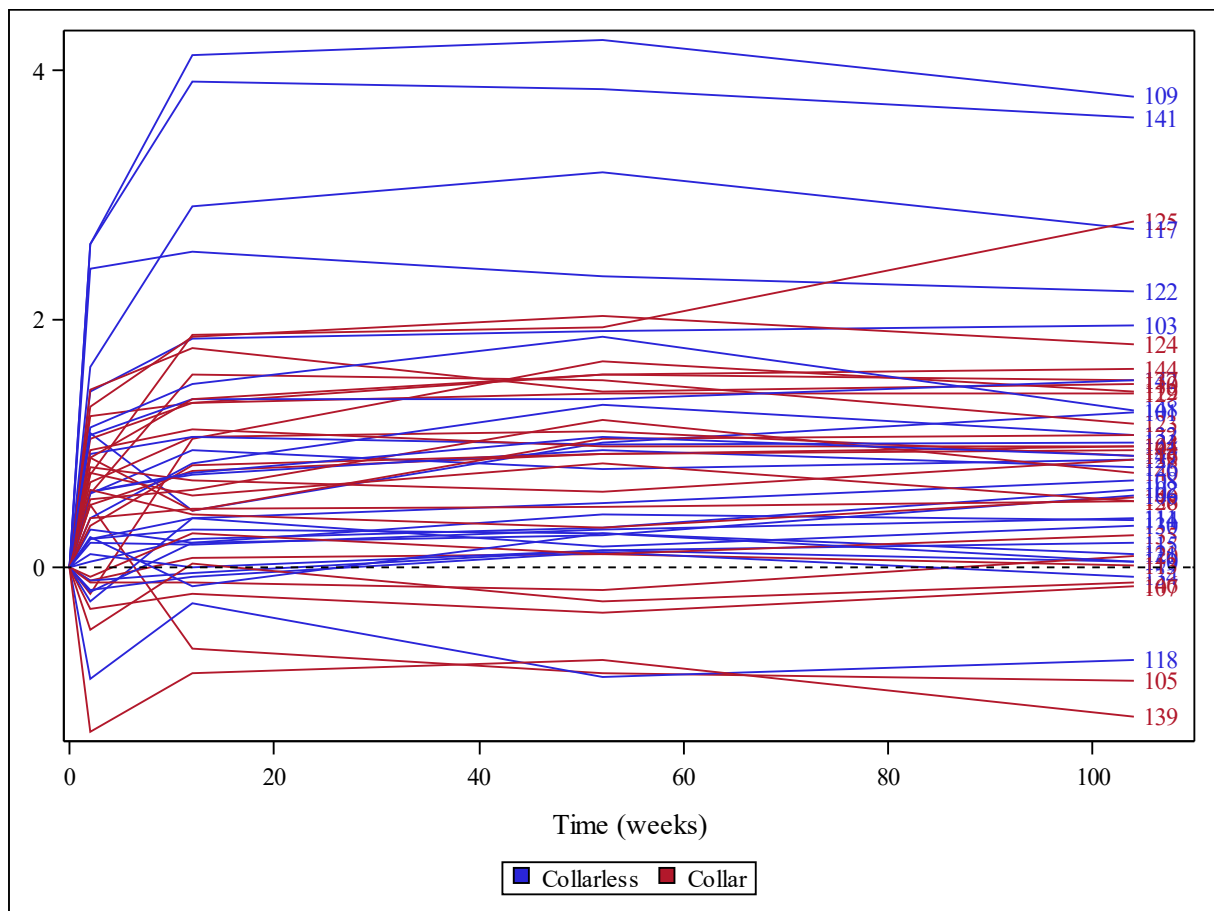

Each line represents an individual patient (both groups combined). Y axis in degrees.

## Z-rotation (vargus/valgus tilt), individual migrator curves

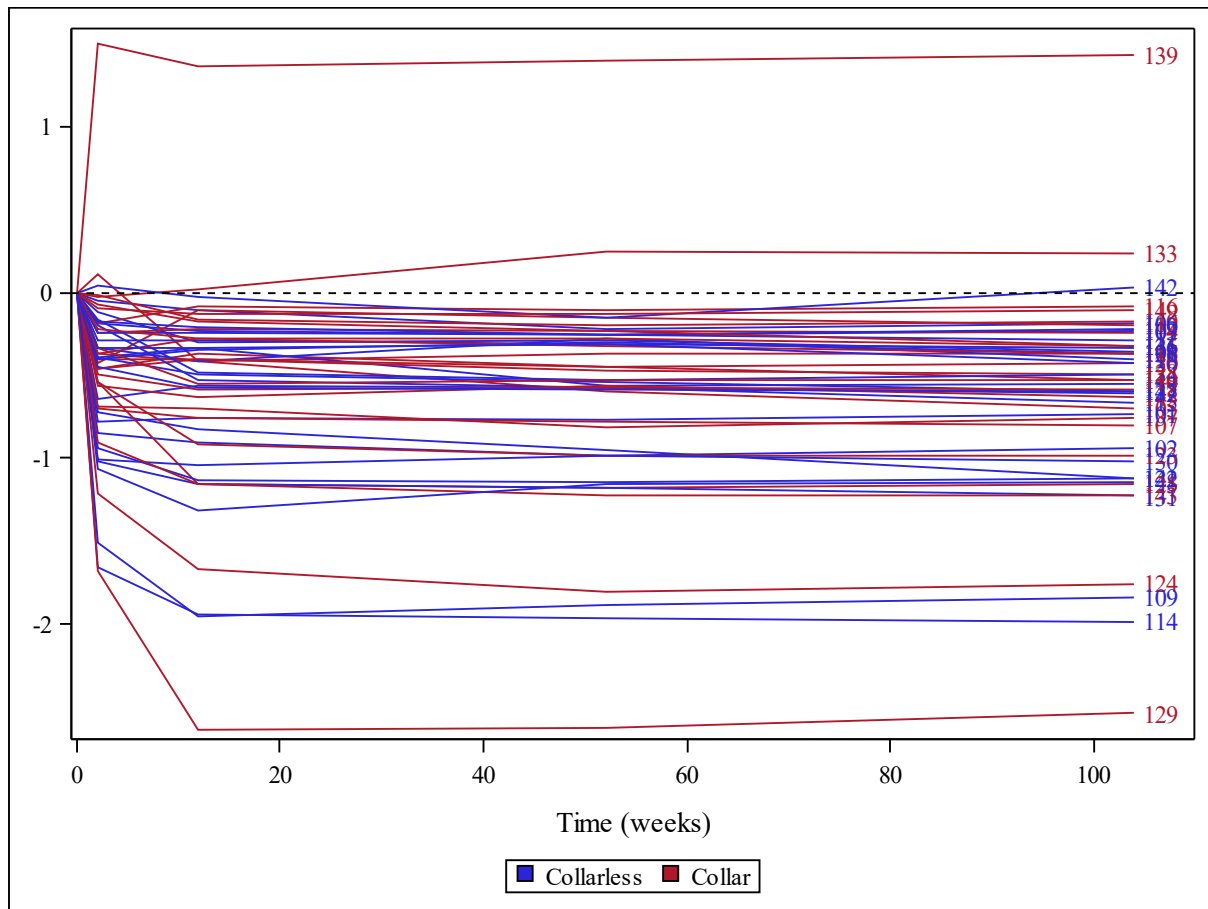

Each line represents an individual patient (both groups combined). Y axis in degrees
